# Supplementary material for: Konjac glucomannan hydrogel dressing and its combination with Chinese medicine for the wound treatment
Source: Royal Society of Chemistry journal article supplement (doi:10.1039/d2nj04178b), 2022-01-01
Supplement: d2nj04178b1.pdf [file d2nj04178b1.pdf]

Supporting information of

## **Konjac glucomannan hydrogel dressing and its combination with Chinese medicine for wound treatment**

Li Yang,<sup>a</sup> Quan Zhao<sup>a</sup>, Zhaoyuan Guo<sup>a,b</sup>, Yilin Liu,<sup>a</sup> Wenxia Gao<sup>b</sup>, Yuji Pu<sup>a</sup>, Bin He<sup>a\*</sup>

<sup>a</sup>National Engineering Research Center for Biomaterials, College of Biomedical Engineering, Sichuan University, Chengdu 610065, China

<sup>b</sup>College of Chemistry & Materials Engineering, Wenzhou University, Wenzhou 325027, China

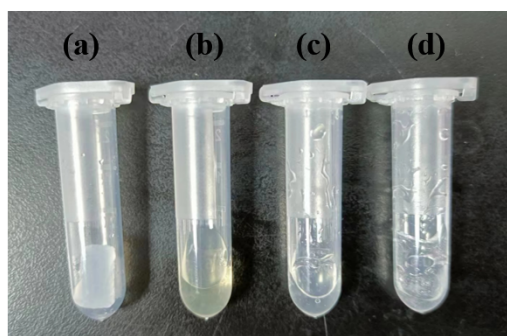

|         | a   | b        | c        | d        |
|---------|-----|----------|----------|----------|
| pH 13.5 | +   | +        | +        | -        |
| NaCl    | +   | +        | -        | +        |
| -20 °C  | +   | -        | +        | +        |
| Results | gel | solution | solution | solution |

Fig. S1 Konjac glucomannan hydrogel prepared at different conditions.

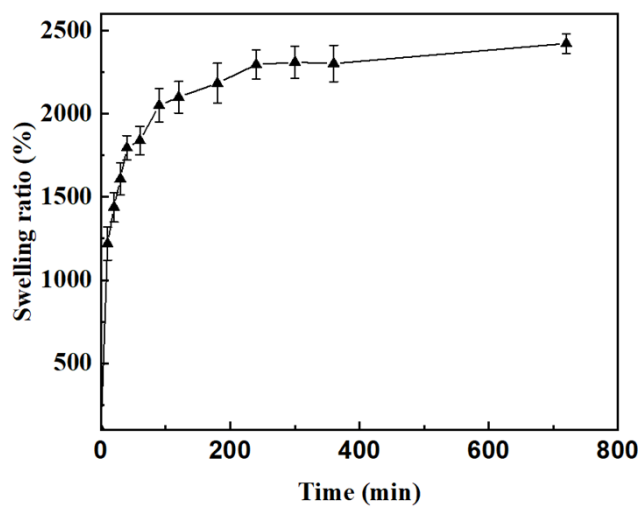

Fig. S2 The swelling ratio of KGM hydrogel.

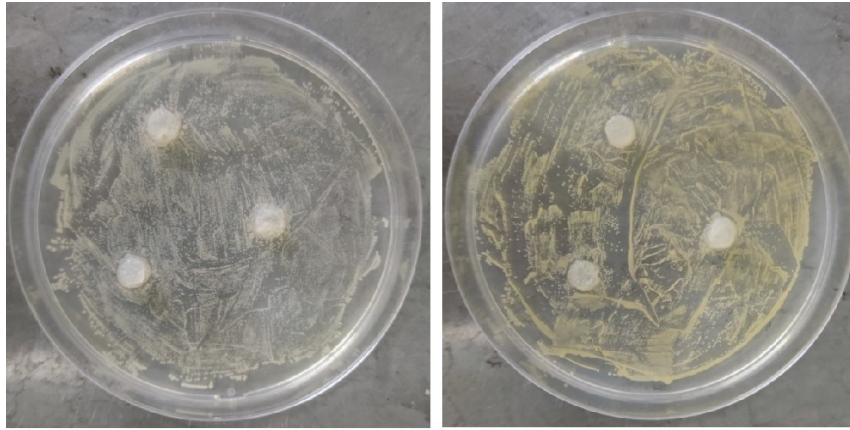

*E. coli*

*S. aureus*

**Fig. S3** Inhibition zone results of KGM hydrogel against *E. coli* and *S. aureus* (three parallel experiments were carried out).

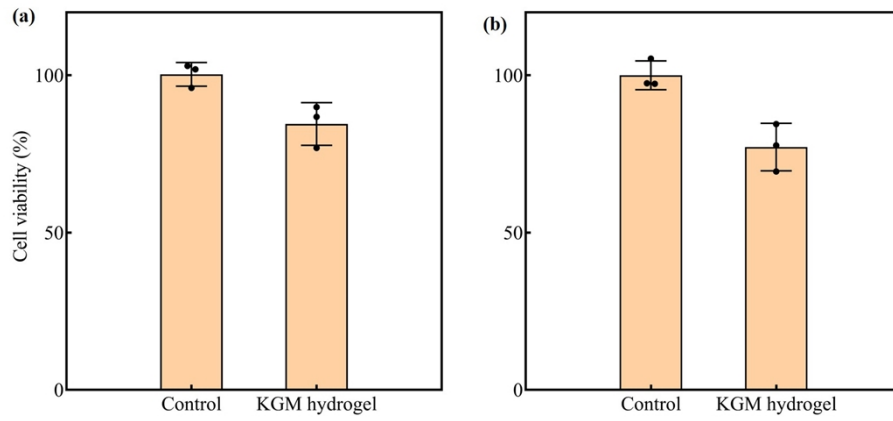

**Fig. S4** The cell viability after co-incubation with KGM hydrogel for 24 (a) and 72 (b) h.

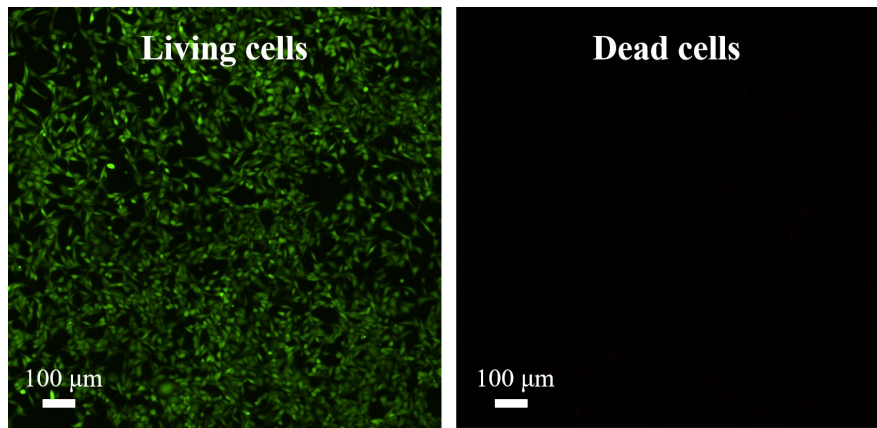

**Fig. S5** CLSM images of L929 mouse fibroblast cells by live/dead staining. Live and dead cells were green and red, respectively.

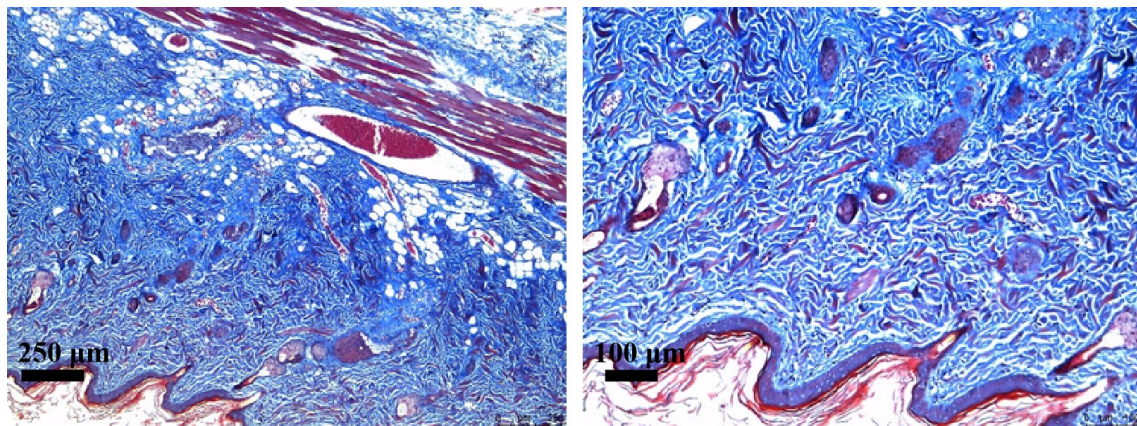

**Fig. S6** Masson staining images of normal skin.

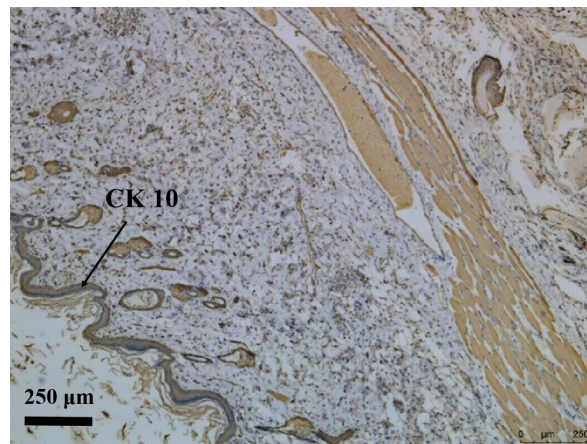

**Fig. S7** CK10 staining image of normal skin.

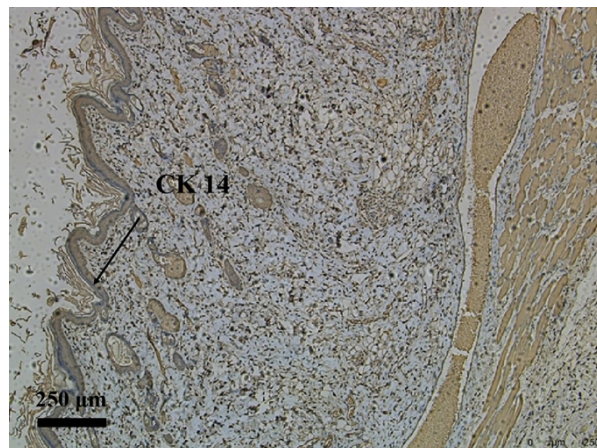

**Fig. S8** CK14 staining image of normal skin.

**Table S1.** Physical properties of KGM hydrogel before and after UV treatment.

|        | Hardness (g) | springiness | cohesiveness | Resilience |
|--------|--------------|-------------|--------------|------------|
| Before | 1350         | 0.78        | 0.620        | 0.378      |
| After  | 1330         | 0.767       | 0.618        | 0.376      |

**Table S2.** CK10 mRNA relative expression levels in the acute wound (n = 3, x ± s).

| Constituencies | Day 3           | Day 7           | Day 14          |
|----------------|-----------------|-----------------|-----------------|
| Gauze          | 0.105 ± 0.057   | 0.136 ± 0.118   | 0.196 ± 0.034   |
| Hydrogel       | 0.185 ± 0.075   | 0.258 ± 0.173   | 0.386 ± 0.184   |
| <i>P</i> value | <i>P</i> > 0.05 | <i>P</i> > 0.05 | <i>P</i> > 0.05 |

**Table S3.** CK14 mRNA relative expression levels in the acute wound (n = 3, x ± s).

| Constituencies | Day 3           | Day 7           | Day 14          |
|----------------|-----------------|-----------------|-----------------|
| Gauze          | 0.538 ± 0.08    | 0.716 ± 0.113   | 0.814 ± 0.047   |
| Hydrogel       | 0.573 ± 0.143   | 0.990 ± 0.138   | 1.221 ± 0.086   |
| <i>P</i> value | <i>P</i> > 0.05 | <i>P</i> > 0.05 | <i>P</i> < 0.05 |

**Table S4.** CK10 mRNA relative expression levels in the chronic wound (n = 3, x ± s).

| Constituencies | Day 3         | Day 7         | Day 14        |
|----------------|---------------|---------------|---------------|
| Hydrogel       | 0.066 ± 0.027 | 0.133 ± 0.04  | 0.209 ± 0.030 |
| WF + Hydrogel  | 0.082 ± 0.046 | 0.149 ± 0.069 | 0.238 ± 0.106 |
| ARO + Hydrogel | 0.056 ± 0.025 | 0.171 ± 0.073 | 0.328 ± 0.055 |

**Table S5.** CK14 mRNA relative expression levels in the chronic wound (n = 3, x ± s).

| Constituencies | Day 3         | Day 7         | Day 14        |
|----------------|---------------|---------------|---------------|
| Hydrogel       | 0.214 ± 0.095 | 0.408 ± 0.146 | 0.540 ± 0.078 |
| WF + Hydrogel  | 0.289 ± 0.056 | 0.492 ± 0.096 | 0.566 ± 0.008 |
| ARO + Hydrogel | 0.339 ± 0.011 | 0.649 ± 0.116 | 0.734 ± 0.154 |
